# Supplementary material for: Wellbeing at Work before and during the SARS-COV-2 Pandemic: A Brazilian Nationwide Study among Dietitians
Source: PubMed Central journal article supplement (PMC7432096; doi:10.3390/ijerph17155541), 2020-07-31
Supplement: ijerph-17-05541-s001.pdf [file ijerph-17-05541-s001.pdf]

**Table S1.** Well-being at work by factors and by socioeconomic and demographic variables of Brazilian dietitians before and during the pandemic period (n = 1359).

| VARIABLE                            |                    | Before pandemic |           |           |           | During pandemic |           |           |           |
|-------------------------------------|--------------------|-----------------|-----------|-----------|-----------|-----------------|-----------|-----------|-----------|
|                                     |                    | Mean±SD         |           |           |           | Mean±SD         |           |           |           |
|                                     |                    | Factor 1        | Factor 2  | Factor 3  | Factor 4  | Factor 1        | Factor 2  | Factor 3  | Factor 4  |
| Gender                              | Female             | 3.46±0.87       | 4.08±0.68 | 4.08±0.78 | 3.91±0.93 | 3.25±0.94       | 3.93±0.77 | 3.98±0.85 | 3.68±1.01 |
|                                     | Male               | 3.50±0.90       | 4.11±0.69 | 4.06±0.79 | 3.90±0.90 | 3.28±0.95       | 3.96±0.82 | 3.91±0.95 | 3.56±1.09 |
| Age group                           | 21 to 24 y/o       | 3.41±0.90       | 4.05±0.75 | 4.06±0.79 | 3.82±0.99 | 3.14±0.95       | 3.87±0.85 | 3.90±0.92 | 3.56±1.12 |
|                                     | 25 to 29 y/o       | 3.44±0.86       | 4.09±0.61 | 4.10±0.73 | 3.96±0.85 | 3.24±0.90       | 3.93±0.71 | 4.00±0.82 | 3.68±0.98 |
|                                     | 30 to 34 y/o       | 3.51±0.83       | 4.11±0.68 | 4.13±0.75 | 3.93±0.92 | 3.30±0.92       | 3.97±0.80 | 4.01±0.82 | 3.68±1.02 |
|                                     | 35 to 39 y/o       | 3.48±0.83       | 4.14±0.62 | 4.12±0.74 | 3.96±0.89 | 3.28±0.92       | 3.99±0.77 | 4.00±0.86 | 3.71±0.98 |
|                                     | 40 to 44 y/o       | 3.45±0.96       | 3.96±0.79 | 3.94±0.92 | 3.88±1.00 | 3.27±0.98       | 3.84±0.80 | 3.89±0.93 | 3.72±1.00 |
|                                     | 45 to 49 y/o       | 3.39±0.91       | 4.03±0.75 | 4.02±0.87 | 3.82±1.02 | 3.15±1.00       | 3.87±0.79 | 3.89±0.91 | 3.53±1.14 |
| Brazilian region                    | 50 to older        | 3.47±0.92       | 4.11±0.67 | 4.08±0.80 | 3.89±0.95 | 3.30±0.96       | 3.97±0.71 | 4.01±0.84 | 3.69±1.00 |
|                                     | North              | 3.43±0.92       | 4.11±0.64 | 4.13±0.73 | 3.91±0.90 | 3.23±0.97       | 3.95±0.75 | 4.02±0.83 | 3.66±1.02 |
|                                     | Northeast          | 3.52±0.87       | 4.13±0.66 | 4.11±0.78 | 3.94±0.92 | 3.27±0.96       | 3.96±0.76 | 3.97±0.86 | 3.67±1.00 |
|                                     | Midwest            | 3.48±0.89       | 4.10±0.72 | 4.11±0.81 | 3.99±0.92 | 3.30±0.94       | 3.97±0.80 | 4.02±0.87 | 3.7±1.04  |
|                                     | Southeast          | 3.4±0.85        | 4.01±0.66 | 4.02±0.76 | 3.79±0.96 | 3.21±0.90       | 3.87±0.74 | 3.94±0.82 | 3.59±1.04 |
|                                     | South              | 3.41±0.83       | 4.04±0.72 | 4.00±0.82 | 3.87±0.92 | 3.22±0.89       | 3.87±0.79 | 3.88±0.92 | 3.62±0.99 |
| Level of education (highest degree) | Undergraduate      | 3.51±0.89       | 4.15±0.64 | 4.14±0.78 | 3.98±0.91 | 3.31±0.94       | 3.99±0.77 | 4.02±0.89 | 3.70±1.04 |
|                                     | Graduate/Residency | 3.46±0.88       | 4.00±0.70 | 4.07±0.79 | 3.90±0.91 | 3.24±0.94       | 3.91±0.77 | 3.95±0.87 | 3.67±0.99 |
|                                     | Master's           | 3.41±0.87       | 4.06±0.68 | 4.06±0.81 | 3.86±0.99 | 3.21±0.92       | 3.90±0.77 | 3.97±0.83 | 3.60±1.07 |
|                                     | PhD                | 3.35±0.88       | 3.92±0.73 | 4.00±0.76 | 3.74±0.97 | 3.29±0.95       | 3.96±0.75 | 4.02±0.77 | 3.73±1.02 |
| Marital status                      | Without partner    | 3.46±0.85       | 4.07±0.67 | 4.09±0.78 | 3.90±0.89 | 3.25±0.91       | 3.91±0.74 | 3.9±0.86  | 3.66±1.02 |
|                                     | With partner       | 3.46±0.89       | 4.09±0.69 | 4.08±0.78 | 3.89±0.95 | 3.26±0.95       | 3.95±0.78 | 3.98±0.86 | 3.68±1.02 |
| Children                            | Yes                | 3.46±0.88       | 4.07±0.69 | 4.04±0.79 | 3.87±0.94 | 3.27±0.93       | 3.93±0.76 | 3.96±0.86 | 3.68±0.99 |
|                                     | No                 | 3.46±0.87       | 4.10±0.68 | 4.11±0.78 | 3.94±0.92 | 3.24±0.94       | 3.93±0.78 | 3.99±0.86 | 3.66±1.04 |
| Family monthly income               | ≤ 1 MW             | 3.43±0.88       | 3.93±0.80 | 4.10±0.65 | 4.00±0.80 | 3.3±0.96        | 3.89±0.78 | 3.97±0.76 | 3.85±0.80 |
|                                     | > 1 to 2 MW        | 3.55±0.93       | 4.19±0.65 | 4.24±0.79 | 4.08±0.86 | 3.3±1.00        | 4.04±0.79 | 4.12±0.86 | 3.83±0.95 |
|                                     | >2 to 3 MW         | 3.49±0.86       | 4.11±0.66 | 4.07±0.78 | 3.92±0.90 | 3.27±0.88       | 3.95±0.79 | 3.96±0.86 | 3.69±0.99 |
|                                     | >3 to 5 MW         | 3.44±0.88       | 4.04±0.73 | 4.05±0.84 | 3.87±0.94 | 3.22±0.95       | 3.88±0.79 | 3.93±0.92 | 3.59±1.06 |
|                                     | > 5 to 10 MW       | 3.41±0.85       | 4.06±0.64 | 4.04±0.80 | 3.88±0.96 | 3.24±0.89       | 3.93±0.71 | 3.96±0.85 | 3.67±1.01 |

|                                                    |                                     |           |           |           |           |           |           |           |           |
|----------------------------------------------------|-------------------------------------|-----------|-----------|-----------|-----------|-----------|-----------|-----------|-----------|
|                                                    | > 10 to 20 MW                       | 3.50±0.90 | 4.14±0.68 | 4.14±0.70 | 3.94±0.91 | 3.27±1.01 | 3.95±0.80 | 4.00±0.81 | 3.66±1.05 |
|                                                    | > 20 MW                             | 3.45±0.93 | 4.07±0.76 | 4.06±0.76 | 3.84±0.93 | 3.26±1.00 | 3.92±0.84 | 3.99±0.86 | 3.60±1.06 |
| Area of Practice                                   | Clinic                              | 3.40±0.91 | 4.06±0.69 | 4.08±0.77 | 3.89±0.93 | 3.16±0.95 | 3.88±0.76 | 3.95±0.86 | 3.61±1.04 |
|                                                    | Teaching                            | 3.47±0.92 | 4.08±0.73 | 4.1±0.67  | 3.93±0.91 | 3.34±1.00 | 3.98±0.78 | 4.03±0.74 | 3.73±1.00 |
|                                                    | Foodservice                         |           |           |           |           |           |           |           |           |
|                                                    | administration                      | 3.48±0.91 | 4.09±0.70 | 4.1±0.82  | 3.93±0.92 | 3.31±0.97 | 4±0.78    | 4.05±0.86 | 3.76±1.01 |
|                                                    | Public health                       | 3.27±0.94 | 3.96±0.72 | 3.91±0.87 | 3.73±1.02 | 3.04±1.00 | 3.76±0.81 | 3.73±0.95 | 3.42±1.13 |
|                                                    | More than one area of practice      | 3.52±0.83 | 4.11±0.65 | 4.09±0.77 | 3.93±0.92 | 3.3±0.89  | 3.95±0.76 | 3.98±0.85 | 3.68±1.00 |
|                                                    | Others                              | 3.53±0.79 | 4.17±0.68 | 4.2±0.83  | 4.11±0.82 | 3.35±0.85 | 4.09±0.72 | 4.16±0.84 | 3.94±0.83 |
| Number of workplaces                               | 1                                   | 3.44±0.89 | 4.08±0.71 | 4.06±0.81 | 3.91±0.95 | 3.25±0.95 | 3.95±0.79 | 3.97±0.85 | 3.69±1.03 |
|                                                    | 2                                   | 3.45±0.84 | 4.09±0.62 | 4.14±0.70 | 3.90±0.90 | 3.22±0.90 | 3.9±0.73  | 3.98±0.85 | 3.61±1.03 |
|                                                    | 3                                   | 3.63±0.82 | 4.15±0.64 | 4.11±0.81 | 3.95±0.86 | 3.34±0.93 | 3.92±0.75 | 3.94±0.93 | 3.64±0.98 |
|                                                    | > 3                                 | 3.54±0.86 | 4.10±0.65 | 4.07±0.85 | 3.99±0.81 | 3.4±0.89  | 3.99±0.79 | 4.01±0.90 | 3.79±0.98 |
| Type of institution                                | Private                             | 3.47±0.86 | 4.08±0.70 | 4.06±0.78 | 3.90±0.91 | 3.27±0.91 | 3.92±0.79 | 3.94±0.87 | 3.65±1.01 |
|                                                    | Public                              | 3.45±0.89 | 4.09±0.67 | 4.11±0.78 | 3.93±0.94 | 3.24±0.96 | 3.94±0.75 | 4.01±0.84 | 3.69±1.02 |
| Time undergraduate completion                      | ≤ 2 years                           | 3.46±0.93 | 4.09±0.71 | 4.09±0.80 | 3.90±0.96 | 3.24±0.97 | 3.91±0.82 | 3.96±0.90 | 3.61±1.10 |
|                                                    | >2 to 5 years                       | 3.46±0.88 | 4.07±0.71 | 4.08±0.80 | 3.93±0.89 | 3.25±0.93 | 3.94±0.76 | 4.00±0.82 | 3.68±0.96 |
|                                                    | >5 to 10 years                      | 3.46±0.80 | 4.06±0.66 | 4.08±0.79 | 3.88±0.91 | 3.21±0.88 | 3.87±0.78 | 3.93±0.87 | 3.61±1.01 |
|                                                    | >10 to 15 years                     | 3.50±0.84 | 4.14±0.64 | 4.16±0.68 | 3.97±0.87 | 3.36±0.89 | 4.04±0.73 | 4.06±0.78 | 3.79±0.95 |
|                                                    | >15 years                           | 3.43±0.91 | 4.07±0.68 | 4.02±0.83 | 3.89±0.97 | 3.23±0.98 | 3.92±0.74 | 3.93±0.90 | 3.67±1.04 |
| Do you continue working during COVID-19?           | no                                  | 3.47±0.86 | 4.07±0.73 | 4.03±0.83 | 3.84±0.93 | 3.24±0.92 | 3.91±0.80 | 3.92±0.91 | 3.61±1.00 |
|                                                    | yes in person                       | 3.41±0.93 | 4.07±0.70 | 4.08±0.80 | 3.90±0.95 | 3.24±0.98 | 3±0.77    | 3.96±0.86 | 3.64±1.03 |
|                                                    | yes in person with some adaptations | 3.49±0.85 | 4.10±0.65 | 4.10±0.77 | 3.94±0.93 | 3.26±0.92 | 3.92±0.76 | 3.97±0.88 | 3.69±1.03 |
|                                                    | yes remotely                        | 3.46±0.87 | 4.09±0.67 | 4.09±0.76 | 3.93±0.91 | 3.27±0.93 | 3.96±0.76 | 4.01±0.82 | 3.70±1.01 |
| Did you test positive for COVID-19?                | No                                  | 3.46±0.87 | 4.08±0.76 | 4.08±0.78 | 3.91±0.92 | 3.25±0.93 | 3.94±0.77 | 3.97±0.86 | 3.67±1.01 |
|                                                    | Yes                                 | 3.54±0.92 | 4.13±0.78 | 4.09±0.77 | 3.88±0.97 | 3.31±1.00 | 3.89±0.85 | 3.96±0.88 | 3.55±1.11 |
| Did any family members test positive for COVID-19? | No                                  | 3.46±0.87 | 4.09±0.80 | 4.09±0.78 | 3.92±0.93 | 3.26±0.93 | 3.94±0.77 | 3.98±0.86 | 3.67±1.03 |
|                                                    | Yes (does not live with me)         | 3.46±0.87 | 4.12±0.82 | 4.08±0.69 | 3.95±0.91 | 3.27±0.91 | 3.99±0.61 | 4.02±0.71 | 3.76±1.00 |

---

|                      |           |           |           |           |           |           |           |           |
|----------------------|-----------|-----------|-----------|-----------|-----------|-----------|-----------|-----------|
| Yes (living with me) | 3.43±0.94 | 4.03±0.88 | 4.04±0.82 | 3.87±0.88 | 3.21±0.99 | 3.89±0.80 | 3.91±0.90 | 3.64±0.98 |
|----------------------|-----------|-----------|-----------|-----------|-----------|-----------|-----------|-----------|
